# Supplementary material
Source: publisher figshare collection journal article supplement (https://acs.figshare.com/ndownloader/files/3925303)
Supplement: Supplementary file 1 [file 3925303]

Supporting Information to

# Hierarchically Structured Vanadium Pentoxide–Polymer Hybrid Materials

*Ulrich Tritschler<sup>†,‡</sup>, Igor Zlotnikov<sup>⊥,‡</sup>, Paul Zaslansky<sup>§</sup>,  
Peter Fratzl<sup>⊥</sup>, Helmut Schlaad<sup>⊥,\*</sup> and Helmut Cölfen<sup>†,\*</sup>*

<sup>†</sup>University of Konstanz, Physical Chemistry, Universitätsstraße 10, D-78457 Konstanz, Germany, <sup>‡</sup>Max Planck Institute of Colloids and Interfaces, Department of Biomaterials, Research Campus Golm, D-14424 Potsdam, Germany, <sup>§</sup>Berlin Brandenburg Center for Regenerative Therapies/Julius Wolff Institute, Charité - Universitätsmedizin Berlin, D-13353 Berlin, Germany, <sup>⊥</sup>Max Planck Institute of Colloids and Interfaces, Department of Colloid Chemistry, Research Campus Golm, D-14424 Potsdam, Germany.

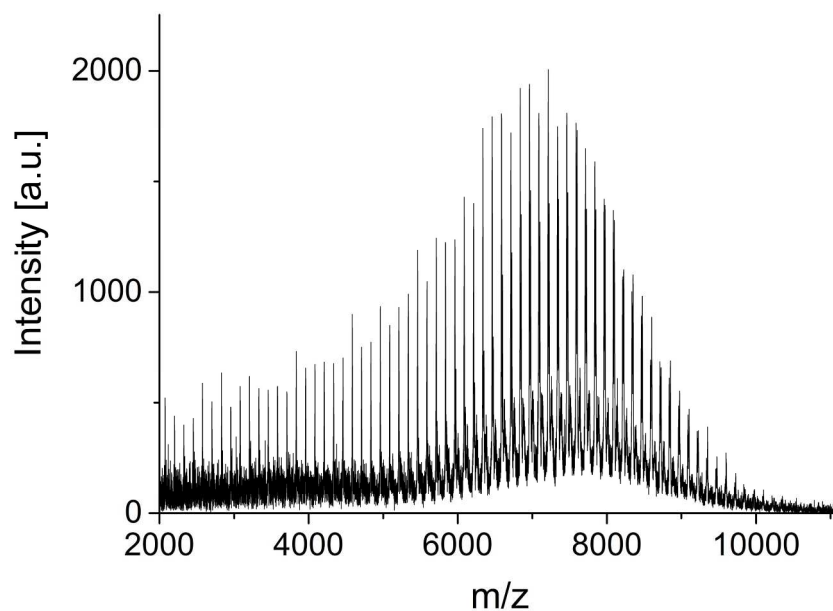

**Figure S1.** MALDI-ToF mass spectrum of the poly[2-(3-butenyl)-2-oxazoline] precursor (number-average molecular weight *ca.* 7200 g/mol).

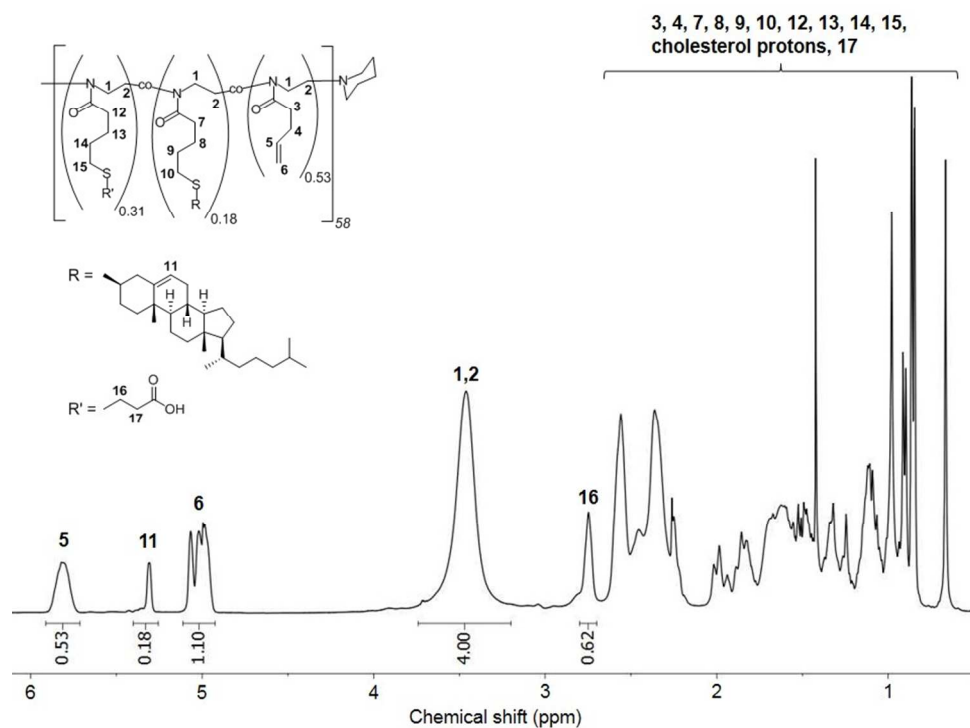

**Figure S2:**  $^1\text{H}$  NMR spectrum (400 MHz,  $\text{CDCl}_3$ ) of the poly[2-(3-butenyl)-2-oxazoline] modified with 1-thiocholesterol and 3-mercaptopropionic acid.

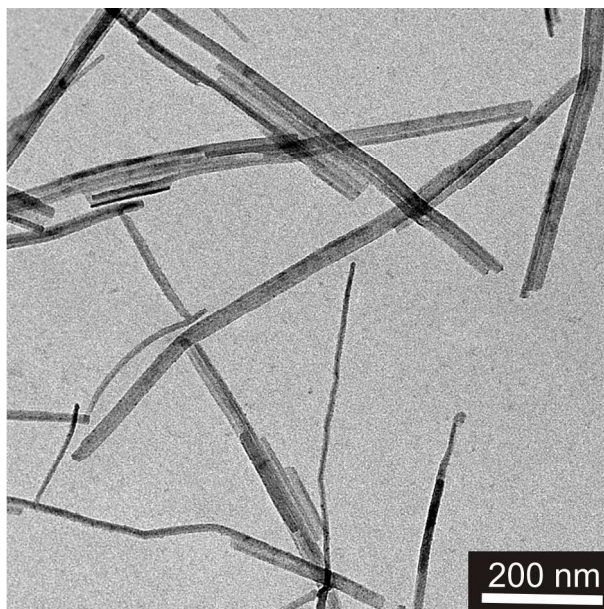

Figure S3: TEM image showing the vanadium pentoxide  $V_2O_5$  taken from tactosol.

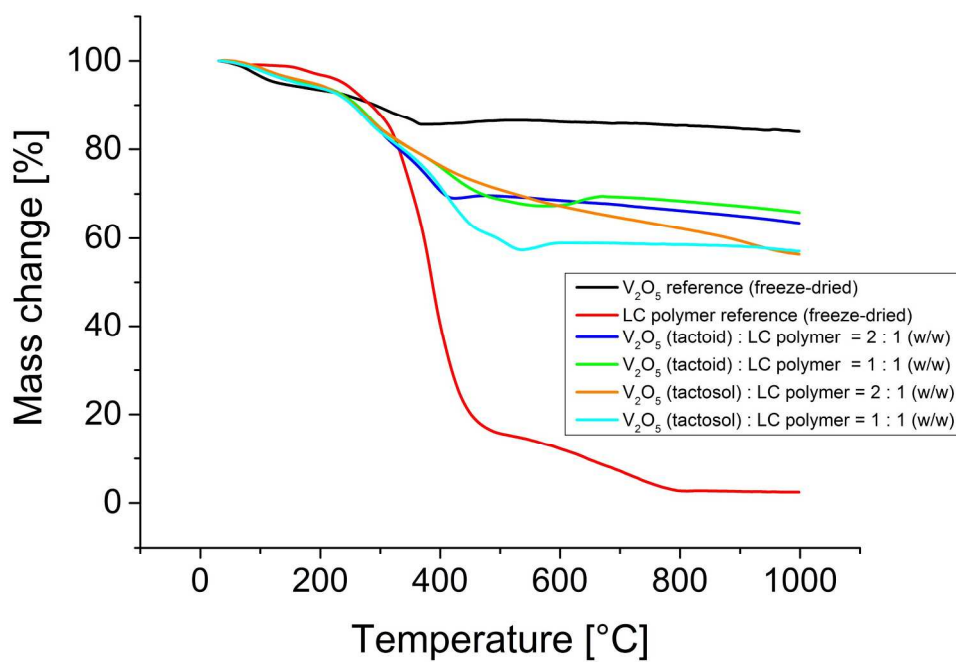

Figure S4: Thermogravimetric analysis of different vanadium pentoxide composite materials and of vanadium pentoxide and polymer reference.

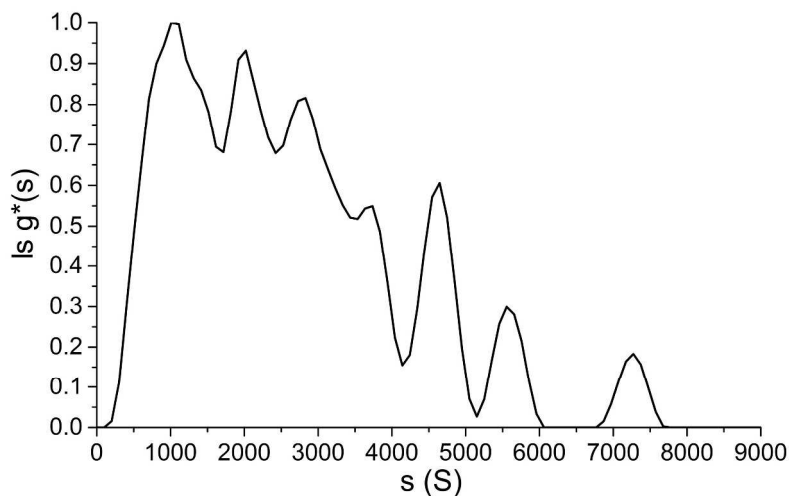

**Figure S5:** AUC sedimentation coefficient distribution of  $V_2O_5$  dispersion (4.6K rpm, absorbance optics). The non-diffusion-corrected distribution of the sediment  $lg^*(s)$  (y axis) illustrates an apparent measure of the concentration of the absorbing species, and the sedimentation coefficients  $s$  (in units of S (Svedberg) =  $10^{-13}$  seconds, x axis) are proportional to the size and density of the sedimenting particles.

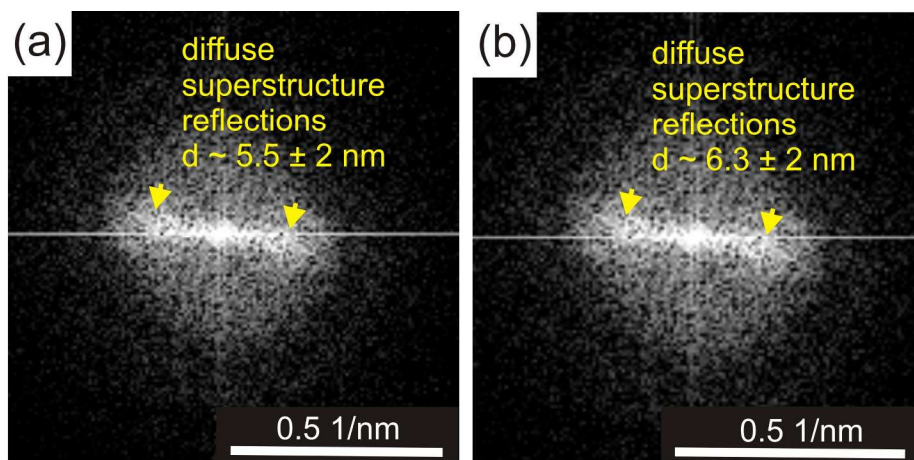

**Figure S6.** FFT analysis on cross sections of  $V_2O_5$  composite CEN-ISO (a) and CEN-TACT (b) (thickness of cuts 85 nm). Superstructure reflections reveal a packing of ribbons of *ca.* 5-6 nm.

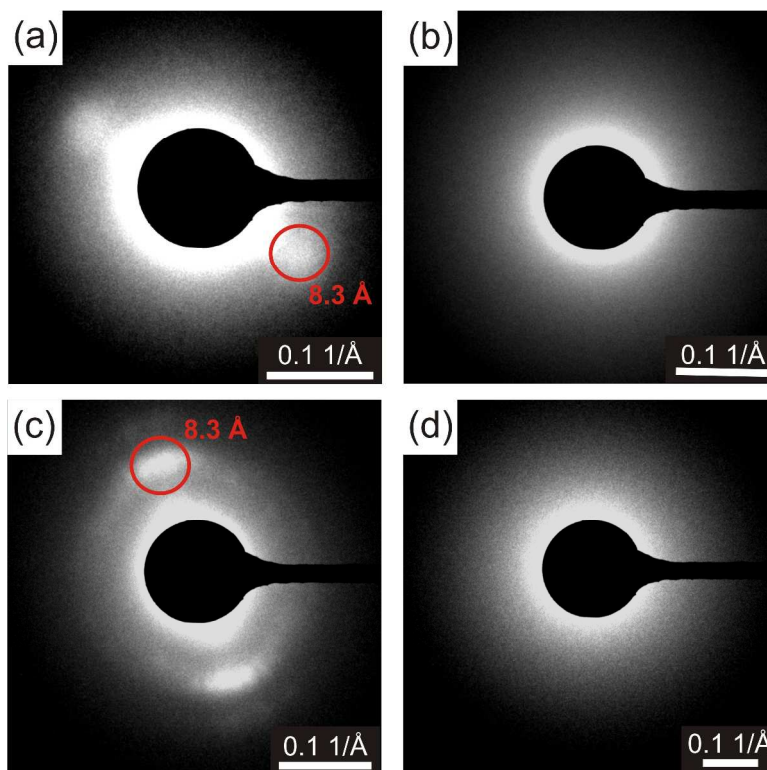

**Figure S7.** Electron diffraction on  $\text{V}_2\text{O}_5$  composite materials CEN-ISO (cross section (a) and longitudinal section (b)) and CEN-TACT (cross section (c) and longitudinal section (d)). Electron diffractions were taken from domains illustrated in Figure 10. Phase-transfer from aqueous medium to THF was performed *via* centrifugation, and subsequently, samples were rotationally sheared. Cross sectional cuts of the composites exhibit a thickness of 85 nm and longitudinal cuts a thickness of 95 nm. Only ED of cross sections reveals spots corresponding to a distance of *ca.* 8.3 Å.
